# Supplementary material for: QTL and candidate genes for heterophylly in soybean based on two populations of recombinant inbred lines
Source: Front Plant Sci. 2022 Aug 16;13:961619. doi: 10.3389/fpls.2022.961619 (PMC9427049; doi:10.3389/fpls.2022.961619)
Supplement: Supplementary file 1 [file Data_Sheet_1.xlsx]

## Sheet: Tab.S1
Table S1. Characteristics of the 20 linkage groups (LGs) in the soybean genetic map constructed from JJ and JS RIL populations.
Population	Linkage group	No. of Bin	Distance (cM)	Average distance between markers (cM)	Largest gap (cM)
JJ/JS	Gm01	70/69	80.86/95.67	1.17/1.41	11.84/12.77
	Gm02	96/92	128.67/153.21	1.35/1.68	9.07/36.32
	Gm03	118/100	146.54/100.23	1.25/1.01	34.80/26.3
	Gm04	104/84	131.74/117.61	1.28/1.42	14.58/10.49
	Gm05	104/89	118.38/118.77	1.15/1.35	9.47/27.47
	Gm06	131/98	229.91/156.85	1.77/1.62	44.12/21.65
	Gm07	99/111	135.87/135.83	1.39/1.23	16.24/10.77
	Gm08	111/121	166.5/171.39	1.51/1.43	9.67/18.61
	Gm09	98/142	93.91/125.92	0.97/0.89	6.64/6.04
	Gm10	103/116	143.66/129.27	1.41/1.12	11.97/4.95
	Gm11	63/77	122.81/107.8	1.98/1.42	31.46/24.06
	Gm12	84/55	113.52/111.75	1.37/2.07	15.02/16.46
	Gm13	127/133	143.22/175.75	1.14/1.33	13.51/15.95
	Gm14	109/104	99.96/97.18	0.93/0.94	7.20/10.76
	Gm15	98/127	134.58/130.21	1.39/1.03	20.80/8.57
	Gm16	94/106	101.57/112.17	1.09/1.07	13.79/18.59
	Gm17	83/92	124.38/136.71	1.52/1.50	20.45/10.73
	Gm18	133/136	136.46/131.95	1.03/0.98	28.03/17.71
	Gm19	108/133	125.38/133.01	1.17/1.01	24.57/12.14
	Gm20	108/124	114.66/123.12	1.07/1.00	6.02/30.51
	Max	133/136	191.43/170.61	1.98/2.07	34.80/30.51
	Min	63/55	80.86/95.06	0.93/0.89	6.02/4.95
	Total	1970/2170	2535.40/2559.97	1.29/1.28	-

## Sheet: Tab.S2
Table S2 Gene models on Genome build Glyma 1.1 Chromosome of specific leaf type traits
Leaf traitA	Loci name	ChrB	CIv1.1 (bp)C	GND	Wm82.a1.v1.1E	Start	Stop
		1	48860000-49135000	1	Glyma01g151800	48859327	48866275
				2	Glyma01g151900	48865268	48865465
				3	Glyma01g152000	48877448	48881248
				4	Glyma01g152100	48886582	48894994
				5	Glyma01g152200	48919906	48921078
				6	Glyma01g152300	48921127	48923448
				7	Glyma01g152400	48944667	48945035
				8	Glyma01g152500	48952458	48958205
				9	Glyma01g152600	48960693	48961382
				10	Glyma01g152700	48963151	48967064
				11	Glyma01g152800	48981095	48981806
				12	Glyma01g152900	49006714	49014546
				13	Glyma01g153000	49017001	49018976
				14	Glyma01g153100	49020073	49027128
				15	Glyma01g153200	49031976	49040525
				16	Glyma01g153300	49049375	49052359
				17	Glyma01g153400	49095755	49096312
				18	Glyma01g153500	49096486	49097279
				19	Glyma01g153600	49102745	49110364
				20	Glyma01g153700	49110517	49113715
				21	Glyma01g153800	49116143	49118967
				22	Glyma01g153900	49120870	49124465
				23	Glyma01g154000	49131014	49133148
		18	55800000-56175000	1	Glyma18g275900	55808344	55811631
				2	Glyma18g276000	55818654	55823401
				3	Glyma18g276100	55828898	55829787
				4	Glyma18g276200	55832841	55845279
				5	Glyma18g276300	55846093	55853463
				6	Glyma18g276400	55856703	55857803
				7	Glyma18g276500	55861770	55865686
				8	Glyma18g276600	55866582	55869929
				9	Glyma18g276700	55870778	55872454
				10	Glyma18g276800	55873039	55876738
				11	Glyma18g276900	55885009	55890555
				12	Glyma18g277000	55891640	55895016
				13	Glyma18g277100	55913585	55914521
				14	Glyma18g277200	55915691	55916809
				15	Glyma18g277300	55917312	55920484
				16	Glyma18g277400	55922710	55923495
				17	Glyma18g277500	55923773	55924841
				18	Glyma18g277600	55931856	55932610
				19	Glyma18g277700	55943605	55944250
				20	Glyma18g277800	55950684	55951016
				21	Glyma18g277900	55955035	55955779
				22	Glyma18g278000	55956758	55960739
				23	Glyma18g278100	55964515	55967181
				24	Glyma18g278200	55980551	55984677
				25	Glyma18g278300	55991048	55996455
				26	Glyma18g278400	55998387	56002158
				27	Glyma18g278500	56003106	56004162
				28	Glyma18g278600	56005545	56006375
				29	Glyma18g278700	56009037	56009873
				30	Glyma18g278800	56010994	56013915
				31	Glyma18g278900	56019403	56022725
				32	Glyma18g279000	56023788	56029617
				33	Glyma18g279100	56025028	56025339
				34	Glyma18g279200	56030428	56033542
				35	Glyma18g279300	56034493	56035229
				36	Glyma18g279400	56037130	56041783
				37	Glyma18g279500	56042606	56052443
				38	Glyma18g279600	56054299	56061027
				39	Glyma18g279700	56065123	56066082
				40	Glyma18g279800	56074203	56079359
				41	Glyma18g279900	56084932	56088020
				42	Glyma18g280000	56093039	56095398
				43	Glyma18g280100	56094747	56095007
				44	Glyma18g280200	56100685	56107771
				45	Glyma18g280300	56110850	56121368
				46	Glyma18g280400	56122911	56126419
				47	Glyma18g280500	56128100	56135781
				48	Glyma18g280600	56140523	56147728
				49	Glyma18g280700	56158545	56161978
		19	45157000-45290000	1	Glyma19g194100	45162928	45164877
				2	Glyma19g194200	45170699	45172441
				3	Glyma19g194300	45183357	45185175
				4	Glyma19g194400	45195804	45200599
				5	Glyma19g194500	45201612	45206816
				6	Glyma19g194600	45207593	45209670
				7	Glyma19g194700	45210818	45215315
				8	Glyma19g194800	45215929	45223182
				9	Glyma19g194900	45227431	45228555
				10	Glyma19g195000	45240022	45240691
				11	Glyma19g195100	45246104	45247508
				12	Glyma19g195200	45249420	45250751
				13	Glyma19g195300	45253254	45259742
				14	Glyma19g195400	45262941	45267834
				15	Glyma19g195500	45269604	45270824
				16	Glyma19g195600	45273343	45277374
				17	Glyma19g195700	45278065	45279422
		20	35765000-35915000	1	Glyma20g115900	35771953	35773591
				2	Glyma20g116000	35808971	35811285
				3	Glyma20g116100	35813475	35816910
				4	Glyma20g116200	35827672	35830107
				5	Glyma20g116300	35850954	35855780
				6	Glyma20g116400	35856555	35860588
				7	Glyma20g116500	35894331	35895981
A Leaf trait.
B Chr refers to chromosome.
C The physical position corresponding to the 95% confidence interval for the detected QTL based on Glyma.Wm82. a1. v1.1 gene model.
D GN refers to gene number.
E Wm82.a1.v1.1, Glyma.Wm82.a1.v1.1 gene model from SoyBase.

## Sheet: Tab.S3
Table S3 Gene Ontology (GO) enrichment analysis of specific leaf type traits.
Leaf trait	Ontology	Description	Glyma 1.1 ID	GO terms
	Biological process		Glyma.01G151800	GO:0000272polysaccharide catabolic process
				GO:0048831regulation of shoot system development
			Glyma.01G151900	NA
			Glyma.01G152000	NA
			Glyma.01G152100	GO:0080092regulation of pollen tube growth
			Glyma.01G152200	GO:0006468protein phosphorylation
				GO:0009755hormone-mediated signaling pathway
				GO:0016310phosphorylation
			Glyma.01G152300	GO:0006468protein phosphorylation
			Glyma.01G152400	NA
			Glyma.01G152500	NA
			Glyma.01G152600	GO:0008150biological process
			Glyma.01G152700	GO:0008150biological process
			Glyma.01G152800	NA
			Glyma.01G152900	GO:0055114 oxidation-reduction process
			Glyma.01G153000	GO:0009808 lignin metabolic process
				GO:0009809 lignin biosynthetic process
			Glyma.01G153100	GO:0006397 mRNA processing
			Glyma.01G153200	GO:0006886 intracellular protein transport
				GO:0016192 vesicle-mediated transport
			Glyma.01G153300	GO:0009414 response to water deprivation
				GO:0009639 response to red or far red light
				GO:0009687 abscisic acid metabolic process
				GO:0016125 sterol metabolic process
				GO:0046345 abscisic acid catabolic process
				GO:0055114 oxidation-reduction process
				GO:0071456 cellular response to hypoxia
			Glyma.01G153400	GO:0006412 translation
				GO:0045903 positive regulation of translational fidelity
			Glyma.01G153500	GO:0009769 photosynthesis, light harvesting in photosystem II
				GO:0009772 photosynthetic electron transport in photosystem II
				GO:0018298 protein-chromophore linkage
			Glyma.01G153600	GO:0006486 protein glycosylation
				GO:0052325 cell wall pectin biosynthetic process
				GO:0080147 root hair cell development
			Glyma.01G153700	GO:0009451 RNA modification
			Glyma.01G153800	NA
			Glyma.01G153900	GO:0008150b iological process
			Glyma.01G154000	NA
			Glyma.18g275900	GO:0031146 SCF-dependent proteasomal ubiquitin-dependent protein catabolic process;
			Glyma.18g276000	GO:0008150 biological process;
			Glyma.18g276100	GO:0001709 cell fate determination;
			Glyma.18g276200	GO:0006390 mitochondrial transcription;
			Glyma.18g276300	GO:0008150 biological process;
			Glyma.18g276400	GO:0008150 biological process;
			Glyma.18g276500	GO:0010019 chloroplast-nucleus signaling pathway
				GO:0031930 mitochondria-nucleus signaling pathway
			Glyma.18g276600	GO:0009793 embryo development ending in seed dormancy;
			Glyma.18g276700	NA
			Glyma.18g276800	GO:0003333 amino acid transmembrane transport;
			Glyma.18g276900	GO:0008150 biological process;
			Glyma.18g277000	GO:0006397 mRNA processing
				GO:0009451 RNA modification
				GO:0016554cytidine to uridine editing
				GO:0080156mitochondrial mRNA modification
			Glyma.18g277100	GO:0006355 regulation of transcription, DNA-templated;
			Glyma.18g277200	NA
			Glyma.18g277300	GO:0009051 pentose-phosphate shunt, oxidative branch
				GO:0046177D-gluconate catabolic process
				GO:0080173male-female gamete recognition during double fertilization forming a zygote and endosperm
			Glyma.18g277400	NA
			Glyma.18g277500	NA
			Glyma.18g277600	GO:0080143 regulation of amino acid export;
			Glyma.18g277700	GO:0007165 signal transduction
				GO:0031640killing of cells of other organism
				GO:0050832defense response to fungus
			Glyma.18g277800	GO:0080143 regulation of amino acid export;
			Glyma.18g277900	NA
			Glyma.18g278000	GO:0000027 ribosomal large subunit assembly
				GO:0006364rRNA processing
			Glyma.18g278100	GO:0009658 chloroplast organization
				GO:0009909regulation of flower development
			Glyma.18g278200	GO:0006468 protein phosphorylation
				GO:0016032viral process
				GO:0051607defense response to virus
			Glyma.18g278300	NA
			Glyma.18g278400	GO:0008150 biological process;
			Glyma.18g278500	GO:0055114 oxidation-reduction process;
			Glyma.18g278600	GO:0008150 biological process;
			Glyma.18g278700	GO:0008150 biological process;
			Glyma.18g278800	GO:0006557S-adenosylmethioninamine biosynthetic process
				GO:0006596polyamine biosynthetic process
				GO:0006597spermine biosynthetic process
				GO:0008295spermidine biosynthetic process
				GO:0016458 gene silencing
				GO:0019079viral genome replication
				GO:0099402plant organ development
			Glyma.18g278900	GO:0006562 proline catabolic process
				GO:0006970response to osmotic stress
				GO:0009414response to water deprivation
				GO:0010133proline catabolic process to glutamate
				GO:0055114 oxidation-reduction process
			Glyma.18g279000	GO:0006888 endoplasmic reticulum to Golgi vesicle-mediated transport;
			Glyma.18g279100	NA
			Glyma.18g279200	NA
			Glyma.18g279300	GO:0008150 biological process;
			Glyma.18g279400	NA
			Glyma.18g279500	GO:0007091 metaphase/anaphase transition of mitotic cell cycle
				GO:0007276gamete generation
				GO:0007346 regulation of mitotic cell cycle
				GO:0009733response to auxin
				GO:0010071root meristem specification
				GO:0016567protein ubiquitination
				GO:0030154 cell differentiation
				GO:0031145anaphase-promoting complex-dependent catabolic process
				GO:0045842positive regulation of mitotic metaphase/anaphase transition
				GO:0048364root development
				GO:0048829 root cap development
				GO:0051301cell division
				GO:0051302regulation of cell division
				GO:0051510regulation of unidimensional cell growth
			Glyma.18g279600	GO:0009908 flower development
				GO:0030154cell differentiation
			Glyma.18g279700	GO:0008150 biological process;
			Glyma.18g279800	NA
			Glyma.18g279900	NA
			Glyma.18g280000	NA
			Glyma.18g280100	NA
			Glyma.18g280200	GO:0006468 protein phosphorylation;
			Glyma.18g280300	GO:0006508 proteolysis
				GO:0016925protein sumoylation
				GO:0016926 protein desumoylation
				GO:0048576positive regulation of short-day photoperiodism, flowering
				GO:0048578positive regulation of long-day photoperiodism, flowering
			Glyma.18g280400	NA
			Glyma.18g280500	GO:0006997 nucleus organization;
			Glyma.18g280600	GO:0044237 cellular metabolic process;
			Glyma.18g280700	GO:0006355 regulation of transcription, DNA-templated
				GO:0009908flower development
				GO:0048831regulation of shoot system development
				GO:2000032 regulation of secondary shoot formation
			Glyma.19g194100	GO:0009943 adaxial/abaxial axis specification
				GO:0010073meristem maintenance
				GO:0010075 regulation of meristem growth
				GO:0010305leaf vascular tissue pattern formation
				GO:0010358leaf shaping
				GO:0043433 negative regulation of DNA-binding transcription factor activity
			Glyma.19g194200	GO:0008150 biological process;
			Glyma.19g194300	GO:0006623protein targeting to vacuole
				GO:0009744response to sucrose
				GO:0009908flower development
				GO:0009910negative regulation of flower development
				GO:0010022meristem determinacy
				GO:0010228vegetative to reproductive phase transition of meristem
				GO:0030154cell differentiation
				GO:0090344negative regulation of cell aging
			Glyma.19g194400	NA
			Glyma.19g194500	GO:0006355 regulation of transcription, DNA-templated
				GO:0009414response to water deprivation
				GO:0009651response to salt stress
				GO:0009737response to abscisic acid
				GO:0009738abscisic acid-activated signaling pathway
				GO:0009739response to gibberellin
				GO:0009845seed germination
				GO:0010182sugar mediated signaling pathway
				GO:0010187negative regulation of seed germination
				GO:0010200response to chitin
				GO:0045893positive regulation of transcription, DNA-templated
				GO:0048316seed development
			Glyma.19g194600	NA
			Glyma.19g194700	GO:0016226 iron-sulfur cluster assembly
				GO:0097428 protein maturation by iron-sulfur cluster transfer
			Glyma.19g194800	GO:0010020 chloroplast fission
				GO:0048285organelle fission
			Glyma.19g194900	GO:0009785 blue light signaling pathway
				GO:0080167 response to karrikin
			Glyma.19g195000	NA
			Glyma.19g195100	GO:0000387 spliceosomal snRNP assembly
				GO:0000398 mRNA splicing, via spliceosome
			Glyma.19g195200	GO:0009733 response to auxin;
			Glyma.19g195300	GO:0007018 microtubule-based movement;
			Glyma.19g195400	GO:0005975 carbohydrate metabolic process;
			Glyma.19g195500	GO:0006412 translation
				GO:0009793embryo development ending in seed dormancy
				GO:0016567protein ubiquitination
				GO:0019941 modification-dependent protein catabolic process
			Glyma.19g195600	NA
			Glyma.19g195700	GO:0008150 biological process;
			Glyma.20g115900	NA
			Glyma.20g116000	GO:0008150 biological process;
			Glyma.20g116100	GO:0006412 translation;
			Glyma.20g116200	GO:0009908 flower development
				GO:0009909 regulation of flower development
				GO:0009965 leaf morphogenesis
				GO:0010093specification of floral organ identity
				GO:0010158abaxial cell fate specification
				GO:0048440 carpel development
				GO:0048443stamen development
				GO:0048653 anther development
			Glyma.20g116300	GO:0008104 protein localization
				GO:0015031protein transport
			Glyma.20g116400	NA
			Glyma.20g116500	GO:0006400 tRNA modification
				GO:0009691cytokinin biosynthetic process
				GO:0080117 secondary growth
	Molecular Function		Glyma.01G151800	GO:0003700DNA-binding transcription factor activity
				GO:0005515protein binding
				GO:0102229amylopectin maltohydrolase activity
			Glyma.01G151900	NA
			Glyma.01G152000	GO:0016747 transferase activity, transferring acyl groups other than amino-acyl groups;
			Glyma.01G152100	GO:0005089 Rho guanyl-nucleotide exchange factor activity;
			Glyma.01G152200	GO:0004674protein serine/threonine kinase activity
				GO:0005515protein binding
				GO:0005524ATP binding
				GO:0016301kinase activity
			Glyma.01G152300	GO:0004674 protein serine/threonine kinase activity
				GO:0005524ATP binding
				GO:0016301 kinase activity
			Glyma.01G152400	NA
			Glyma.01G152500	NA
			Glyma.01G152600	GO:0003674 molecular function;
			Glyma.01G152700	GO:0003674 molecular function;
			Glyma.01G152800	NA
			Glyma.01G152900	GO:0046577 long-chain-alcohol oxidase activity
				GO:0050660 flavin adenine dinucleotide binding
			Glyma.01G153000	GO:0005515 protein binding;
			Glyma.01G153100	NA
			Glyma.01G153200	NA
			Glyma.01G153300	GO:0004497 monooxygenase activity
				GO:0005506iron ion binding
				GO:0010295(+)-abscisic acid 8'-hydroxylase activity
				GO:0016491oxidoreductase activity
				GO:0016709oxidoreductase activity, acting on paired donors, with incorporation or reduction of molecular oxygen, NAD(P)H as one donor, and incorporation of one atom of oxygen
				GO:0020037heme binding
			Glyma.01G153400	GO:0003735 structural constituent of ribosome
				GO:0019843 rRNA binding
			Glyma.01G153500	GO:0005515 protein binding
				GO:0045156 electron transporter, transferring electrons within the cyclic electron transport pathway of photosynthesis activity
				GO:0045157 electron transporter, transferring electrons within the noncyclic electron transport pathway of photosynthesis activity
			Glyma.01G153600	GO:0052636 arabinosyltransferase activity;
			Glyma.01G153700	NA
			Glyma.01G153800	NA
			Glyma.01G153900	GO:0003674 molecular function;
			Glyma.01G154000	NA
			Glyma.18g275900	GO:0004842 ubiquitin-protein transferase activity
				GO:0005515 protein binding
			Glyma.18g276000	GO:0016787 hydrolase activity;
			Glyma.18g276100	GO:0016757 transferase activity, transferring glycosyl groups;
			Glyma.18g276200	GO:0003677 DNA binding
				GO:0003899 DNA-directed 5'-3' RNA polymerase activity
				GO:0034062 5'-3' RNA polymerase activity
			Glyma.18g276300	GO:0003729 mRNA binding;
			Glyma.18g276400	GO:0005515 protein binding;
			Glyma.18g276500	GO:0003677 DNA binding;
			Glyma.18g276600	NA
			Glyma.18g276700	NA
			Glyma.18g276800	GO:0015171 amino acid transmembrane transporter activity;
			Glyma.18g276900	GO:0005515 protein binding;
			Glyma.18g277000	GO:0005515 protein binding;
			Glyma.18g277100	GO:0003700 DNA-binding transcription factor activity
				GO:0042803 protein homodimerization activity
				GO:0046982 protein heterodimerization activity
			Glyma.18g277200	NA
			Glyma.18g277300	GO:0004616 phosphogluconate dehydrogenase (decarboxylating) activity
				GO:0005515 protein binding
				GO:0050661 NADP binding
			Glyma.18g277400	NA
			Glyma.18g277500	NA
			Glyma.18g277600	GO:0003674 molecular function;
			Glyma.18g277700	NA
			Glyma.18g277800	GO:0003674 molecular function;
			Glyma.18g277900	NA
			Glyma.18g278000	NA
			Glyma.18g278100	GO:0003677 DNA binding
				GO:0003700 DNA-binding transcription factor activity
				GO:0005515 protein binding
				GO:0008270 zinc ion binding
			Glyma.18g278200	GO:0004675 transmembrane receptor protein serine/threonine kinase activity
				GO:0005515 protein binding
				GO:0005524 ATP binding
				GO:0016301 kinase activity
				GO:0042802 identical protein binding
			Glyma.18g278300	NA
			Glyma.18g278400	GO:0003674 molecular function;
			Glyma.18g278500	GO:0016491 oxidoreductase activity;
			Glyma.18g278600	GO:0003674 molecular function;
			Glyma.18g278700	GO:0003674 molecular function;
			Glyma.18g278800	GO:0004014 adenosylmethionine decarboxylase activity
				GO:0005515 protein binding
			Glyma.18g278900	GO:0004657 proline dehydrogenase activity; ;
				GO:0071949 FAD binding
			Glyma.18g279000	GO:0003674 molecular function;
			Glyma.18g279100	NA
			Glyma.18g279200	NA
			Glyma.18g279300	GO:0003674 molecular function;
			Glyma.18g279400	GO:0046537 2,3-bisphosphoglycerate-independent phosphoglycerate mutase activity
				GO:0046872 metal ion binding
			Glyma.18g279500	GO:0005515 protein binding;
				GO:0061630 ubiquitin protein ligase activity
			Glyma.18g279600	GO:0003674 molecular function;
			Glyma.18g279700	GO:0003674 molecular function;
			Glyma.18g279800	GO:0016413 O-acetyltransferase activity;
			Glyma.18g279900	GO:0016413 O-acetyltransferase activity;
			Glyma.18g280000	NA
			Glyma.18g280100	NA
			Glyma.18g280200	GO:0004675 transmembrane receptor protein serine/threonine kinase activity
				GO:0005199 structural constituent of cell wall
				GO:0005524 ATP binding
				GO:0019901 protein kinase binding
			Glyma.18g280300	GO:0070139 SUMO-specific endopeptidase activity;
			Glyma.18g280400	NA
			Glyma.18g280500	GO:0005515 protein binding;
			Glyma.18g280600	GO:0016740 transferase activity;
			Glyma.18g280700	GO:0003677 DNA binding
				GO:0003700 DNA-binding transcription factor activity
				GO:0043565 sequence-specific DNA binding
			Glyma.19g194100	GO:0005515 protein binding;
			Glyma.19g194200	GO:0003674 molecular function;
			Glyma.19g194300	GO:0003712 transcription coregulator activity;
			Glyma.19g194400	NA
			Glyma.19g194500	GO:0003677 DNA binding
				GO:0003700 DNA-binding transcription factor activity
				GO:0005515 protein binding
				GO:0044212 transcription regulatory region DNA binding
			Glyma.19g194600	GO:0005515 protein binding;
			Glyma.19g194700	GO:0005198 structural molecule activity
				GO:0046872 metal ion binding
				GO:00515372 iron, 2 sulfur cluster binding
			Glyma.19g194800	GO:0003924 GTPase activity
				GO:0005515 protein binding
				GO:0005525 GTP binding
				GO:0043621 protein self-association
			Glyma.19g194900	GO:0003674 molecular function;
			Glyma.19g195000	NA
			Glyma.19g195100	GO:0003729 mRNA binding;
			Glyma.19g195200	GO:0003674 molecular function;
			Glyma.19g195300	GO:0003777 microtubule motor activity; ATP binding; microtubule binding; ATP-dependent microtubule motor activity, plus-end-directed; ATPase activity;
				GO:0005524 ATP binding
				GO:0008017 microtubule binding
				GO:0008574 ATP-dependent microtubule motor activity, plus-end-directed
				GO:0016887 ATPase activity
			Glyma.19g195400	GO:0004564 beta-fructofuranosidase activity;
			Glyma.19g195500	GO:0003735 structural constituent of ribosome
				GO:0031386 protein tag
				GO:0031625 ubiquitin protein ligase binding
			Glyma.19g195600	GO:0005524 ATP binding
				GO:0016787 hydrolase activity
			Glyma.19g195700	GO:0003674 molecular function
			Glyma.20g115900	NA
			Glyma.20g116000	GO:0003674 molecular function;
			Glyma.20g116100	GO:0003735 structural constituent of ribosome;
			Glyma.20g116200	GO:0003676 nucleic acid binding
				GO:0003700 DNA-binding transcription factor activity
				GO:0005515 protein binding
				GO:0046872 metal ion binding
			Glyma.20g116300	NA
			Glyma.20g116400	GO:0016298 lipase activity;
			Glyma.20g116500	GO:0005524 ATP binding
				GO:0009824 AMP dimethylallyltransferase activity
				GO:0052381 tRNA dimethylallyltransferase activity
				GO:0052622 ATP dimethylallyltransferase activity
				GO:0052623 ADP dimethylallyltransferase activity
	Cellular Component Descriptions		Glyma.01G151800	GO:0005576 extracellular region
				GO:0005634 nucleus
				GO:0005737 cytoplasm
			Glyma.01G151900	NA
			Glyma.01G152000	GO:0005737 cytoplasm
			Glyma.01G152100	GO:0005739 mitochondrion
				GO:0005886 plasma membrane
			Glyma.01G152200	GO:0005886 plasma membrane
				GO:001602 1integral component of membrane
			Glyma.01G152300	GO:0005886 plasma membrane
				GO:0016021 integral component of membrane
			Glyma.01G152400	NA
			Glyma.01G152500	GO:0005794 Golgi apparatus
				GO:0016021 integral component of membrane
			Glyma.01G152600	GO:0009507 chloroplast
				GO:0016021 integral component of membrane
			Glyma.01G152700	GO:0005886 plasma membrane
				GO:0009941 chloroplast envelope
				GO:0016021 integral component of membrane
			Glyma.01G152800	NA
			Glyma.01G152900	GO:0009507 chloroplast
				GO:0016021 integral component of membrane
			Glyma.01G153000	GO:0005886 plasma membrane
				GO:0009507 chloroplast
				GO:0016020 membrane
				GO:0016021 integral component of membrane
			Glyma.01G153100	GO:0005634 nucleus
			Glyma.01G153200	GO:0005794 Golgi apparatus
				GO:0005829 cytosol
				GO:0005886 plasma membrane
				GO:0005905 clathrin-coated pit
				GO:0009506 plasmodesma
				GO:0030124 AP-4 adaptor complex
			Glyma.01G153300	GO:0005576 extracellular region
				GO:0009507 chloroplast
				GO:0016021 integral component of membrane
			Glyma.01G153400	GO:0000312 plastid small ribosomal subunit
				GO:0009507 chloroplast
				GO:0009536 plastid
				GO:0009570 chloroplast stroma
				GO:0015935 small ribosomal subunit
			Glyma.01G153500	GO:0005739 mitochondrion
				GO:0009507 chloroplast
				GO:0009523 photosystem II
				GO:0009534 chloroplast thylakoid
				GO:0009535 chloroplast thylakoid membrane
				GO:0009536plastid
				GO:0009579thylakoid
				GO:0010287 plastoglobule
				GO:0016021 integral component of membrane
			Glyma.01G153600	GO:0000138 Golgi trans cisterna
				GO:0000139 Golgi membrane
				GO:0005634 nucleus
				GO:0005768 endosome
				GO:0005794 Golgi apparatus
				GO:0005802 trans-Golgi network
				GO:0016021 integral component of membrane
			Glyma.01G153700	GO:0005739 mitochondrion
				GO:0043231 intracellular membrane-bounded organelle
			Glyma.01G153800	NA
			Glyma.01G153900	GO:0005634 nucleus
			Glyma.01G154000	NA
			Glyma.18g275900	GO:0005634 nucleus
			Glyma.18g276000	GO:0005576 extracellular region
			Glyma.18g276100	GO:0005576 extracellular region
			Glyma.18g276200	GO:0005739 mitochondrion
				GO:0009507 chloroplast
				GO:0009536 plastid
				GO:0034245 mitochondrial DNA-directed RNA polymerase complex
				GO:0042651 thylakoid membrane
			Glyma.18g276300	GO:0005634 nucleus
			Glyma.18g276400	GO:0005634 nucleus
			Glyma.18g276500	GO:0009507 chloroplast
			Glyma.18g276600	GO:0009507 chloroplast
			Glyma.18g276700	GO:0016021 integral component of membrane
			Glyma.18g276800	GO:0005773 vacuole
				GO:0005774 vacuolar membrane
				GO:0005886 plasma membrane
				GO:0016021 integral component of membrane
			Glyma.18g276900	GO:0005635 nuclear envelope
				GO:0016021 integral component of membrane
				GO:0031965 nuclear membrane
			Glyma.18g277000	GO:0005739 mitochondrion
				GO:0031019 mitochondrial mRNA editing complex
				GO:0043231 intracellular membrane-bounded organelle
			Glyma.18g277100	GO:0005634 nucleus
			Glyma.18g277200	NA
			Glyma.18g277300	GO:0005737 cytoplasm
				GO:0005777 peroxisome
				GO:0005829 cytosol
				GO:0009570 chloroplast stroma
				GO:0019822 P4 peroxisome
				GO:0099503 secretory vesicle
			Glyma.18g277400	NA
			Glyma.18g277500	NA
			Glyma.18g277600	GO:0005634 nucleus
			Glyma.18g277700	GO:0005576 extracellular region
			Glyma.18g277800	GO:0005634 nucleus
			Glyma.18g277900	NA
			Glyma.18g278000	GO:0005634 nucleus
				GO:0005730 nucleolus
			Glyma.18g278100	GO:0005634 nucleus
			Glyma.18g278200	GO:0005576 extracellular region
				GO:0005886 plasma membrane
				GO:0016021 integral component of membrane
			Glyma.18g278300	NA
			Glyma.18g278400	GO:0005739 mitochondrion
			Glyma.18g278500	GO:0005575 cellular component
			Glyma.18g278600	NA
			Glyma.18g278700	GO:0009507 chloroplast
			Glyma.18g278800	GO:0005829 cytosol
			Glyma.18g278900	GO:0005739 mitochondrion
			Glyma.18g279000	GO:0005789 endoplasmic reticulum membrane
				GO:0005793 endoplasmic reticulum-Golgi intermediate compartment
				GO:0030134 COPII-coated ER to Golgi transport vesicle
				GO:0030173 integral component of Golgi membrane
			Glyma.18g279100	NA
			Glyma.18g279200	GO:0005634 nucleus
				GO:0005666 RNA polymerase III complex
			Glyma.18g279300	NA
			Glyma.18g279400	GO:0005737 cytoplasm
			Glyma.18g279500	GO:0005634 nucleus
				GO:0005680 anaphase-promoting complex
				GO:0005737 cytoplasm
				GO:0005819 spindle
				GO:0009504 cell plate
			Glyma.18g279600	NA
			Glyma.18g279700	GO:0005739 mitochondrion
			Glyma.18g279800	GO:0005794 Golgi apparatus
				GO:0009507 chloroplast
				GO:0016021 integral component of membrane
			Glyma.18g279900	GO:0005794 Golgi apparatus
				GO:0009507 chloroplast
				GO:0016021 integral component of membrane
			Glyma.18g280000	NA
			Glyma.18g280100	NA
			Glyma.18g280200	GO:0005634 nucleus
				GO:0005886 plasma membrane
				GO:0016021 integral component of membrane
			Glyma.18g280300	GO:0005634 nucleus
			Glyma.18g280400	NA
			Glyma.18g280500	GO:0005576 extracellular region
				GO:0005634 nucleus
				GO:0005652 nuclear lamina
				GO:0005739 mitochondrion
				GO:0005829 cytosol
				GO:0034399 nuclear periphery
			Glyma.18g280600	GO:0005634 nucleus
			Glyma.18g280700	GO:0005634 nucleus
			Glyma.19g194100	GO:0005634 nucleus
			Glyma.19g194200	GO:0009507 chloroplast
			Glyma.19g194300	GO:0005634 nucleus
				GO:0005737 cytoplasm
				GO:0005773 vacuole
				GO:0005886 plasma membrane
				GO:0031982 vesicle
			Glyma.19g194400	NA
			Glyma.19g194500	GO:0005634 nucleus
			Glyma.19g194600	GO:0005634 nucleus
				GO:0005737 cytoplasm
			Glyma.19g194700	GO:0005739 mitochondrion
			Glyma.19g194800	GO:0005737 cytoplasm
				GO:0005783 endoplasmic reticulum
				GO:0009507 chloroplast
				GO:0009534 chloroplast thylakoid
				GO:0009570 chloroplast stroma
			Glyma.19g194900	GO:0005634 nucleus
			Glyma.19g195000	NA
			Glyma.19g195100	GO:0005634 nucleus
				GO:0005682 U5 snRNP
				GO:0005685 U1 snRNP
				GO:0005686 U2 snRNP
				GO:0005687 U4 snRNP
				GO:0005689 U12-type spliceosomal complex
				GO:0005773 vacuole
				GO:0005829 cytosol
				GO:0034719 SMN-Sm protein complex
				GO:0043186 P granule
				GO:0071004 U2-type prespliceosome
				GO:0071011 precatalytic spliceosome
				GO:0071013 catalytic step 2 spliceosome
				GO:0097526 spliceosomal tri-snRNP complex
				GO:1990904 ribonucleoprotein complex
			Glyma.19g195200	GO:0005575 cellular component
			Glyma.19g195300	GO:0005737 cytoplasm
				GO:0005819 spindle
				GO:0005871 kinesin complex
				GO:0005874 microtubule
			Glyma.19g195400	GO:0005618 cell wall
				GO:0048046 apoplast
			Glyma.19g195500	GO:0005634 nucleus
				GO:0005737 cytoplasm
				GO:0005829 cytosol
				GO:0005840 ribosome
			Glyma.19g195600	GO:0005739 mitochondrion
			Glyma.19g195700	GO:0005634 nucleus
			Glyma.20g115900	GO:0005737 cytoplasm
			Glyma.20g116000	GO:0005634 nucleus
			Glyma.20g116100	GO:0000311 plastid large ribosomal subunit
				GO:0005829 cytosol
				GO:0009507 chloroplast
				GO:0009570 chloroplast stroma
				GO:0009941 chloroplast envelope
			Glyma.20g116200	GO:0005634 nucleus
			Glyma.20g116300	GO:0005739 mitochondrion
			Glyma.20g116400	GO:0009507 chloroplast;
				GO:0016020 membrane
			Glyma.20g116500	GO:0005739 mitochondrion
				GO:0009507 chloroplast
				GO:0009536 plastid

## Sheet: Tab.S4
Table S4 Non-synonymous mutation SNPs in four QTL intervals.
Loci name	Gene ID	SNP1				SNP2				SNP3				SNP4				SNP5				SNP6				SNP7				SNP8
qLSR01	Glyma.01G152000.1	exon2	c.A599G	p.N200S		exon2	c.G646C	p.E216Q		exon2	c.G1064A	p.G355D
	Glyma.01G152300.1	exon1	c.A1442T	p.K481I		exon1	c.T1447G	p.S483A		exon1	c.A1600C	p.N534H		exon1	c.C2304A	p.D768E
	Glyma.01G152300.1	exon1	c.G781A	p.V261I		exon1	c.T782C	p.V261A		exon1	c.A973G	p.N325D		exon1	c.G997A	p.E333K		exon1	c.T1073A	p.V358E		exon1	c.T1435G	p.Y479D
	Glyma.01G152300.1	exon1	c.C91T	p.P31S		exon1	c.A262G	p.K88E		exon1	c.G275C	p.R92P		exon1	c.T341A	p.I114N		exon1	c.G638A	p.G213D
	Glyma.01G152500.1	exon3	c.A53C	p.H18P
	Glyma.01G152800.1	exon1	c.A12T	p.K4N		exon1	c.C145G	p.P49A		exon1	c.T166C	p.Y56H		exon1	c.A244G	p.T82A
	Glyma.01G153400.1	exon1	c.A110G	p.H37R		exon1	c.G134A	p.R45H		exon1	c.T208C	p.C70R		exon1	c.T215C	p.V72A		exon1	c.T236C	p.I79T
	Glyma.01G153500.1	exon1	c.A85G	p.I29V		exon2	c.A275G	p.D92G		exon2	c.A281T	p.Q94L		exon2	c.G394A	p.G132S		exon2	c.C437T	p.P146L		exon2	c.T453G	p.C151W		exon2	c.T479C	p.V160A		exon2	c.A673G	p.K225E
qLSR18	Glyma.18G275900.2	exon2	c.A40G	p.K14E
	Glyma.18G276100.1	exon2	c.A206G	p.E69G		exon1	c.A31G	p.I11V		exon1	c.T26C	p.F9S
	Glyma.18G276300.1	exon1	c.T166G	p.F56V		exon8	c.T946A	p.L316M
	Glyma.18G276400.1	exon1	c.A752T	p.Y251F		exon1	c.C983A	p.P328H		exon1	c.C1070T	p.T357I
	Glyma.18G276600.1	exon1	c.A322T	p.M108L		exon1	c.T839C	p.V280A		exon1	c.A857G	p.H286R
	Glyma.18G276700.1	exon1	c.T661C	p.F221L		exon1	c.C838T	p.H280Y
	Glyma.18G277000.1	exon1	c.C202T	p.P68S		exon1	c.T1268G	p.V423G		exon1	c.C1867T	p.L623F		exon1	c.A2299C	p.M767L		exon1	c.G2301A	p.M767I		exon1	c.G2359A	p.V787I
	Glyma.18G277700.1	exon1	c.G6T	p.K2N		exon2	c.A83C	p.Q28P
	Glyma.18G277800.1	exon1	c.C198G	p.I66M
	Glyma.18G277900.2	exon2	c.G120T	p.Q40H		exon2	c.C122A	p.T41K
	Glyma.18G278100.1	exon1	c.G648C	p.E216D
	Glyma.18G278200.1	exon11	c.A1765T	p.T589S
	Glyma.18G278400.1	exon1	c.T818C	p.L273S
	Glyma.18G278500.1	exon1	c.C40A	p.Q14K
	Glyma.18G278800.1	exon3	c.A826G	p.I276V
	Glyma.18G278900.1	exon2	c.T790A	p.C264S
	Glyma.18G279000.1	exon2	c.G109A	p.A37T
	Glyma.18G279100.1	exon1	c.T47C	p.I16T		exon1	c.T190C	p.C64R
	Glyma.18G279400.1	exon3	c.G77A	p.R26K		exon5	c.G676A	p.E226K		exon6	c.T763C	p.W255R		exon6	c.G892T	p.A298S		exon7	c.A1207G	p.T403A
	Glyma.18G279500.1	exon6	c.T677A	p.I226N		exon13	c.G1685A	p.R562K
	Glyma.18G279600.1	exon1	c.T499C	p.F167L
	Glyma.18G279700.1	exon2	c.C99G	p.D33E
	Glyma.18G279800.1	exon1	c.A55G	p.I19V		exon2	c.A629G	p.K210R		exon2	c.C1010A	p.T337N		exon2	c.G1091A	p.R364K
	Glyma.18G280300.1	exon6	c.T1491A	p.N497K		exon6	c.G1653T	p.E551D
qLSR19	Glyma.19G194100.1	exon2	c.A176T	p.H59L
	Glyma.19G194300.1	exon4	c.C338T	p.P113L
	Glyma.19G194400.1	exon5	c.A776T	p.Q259L
	Glyma.19G194600.1	exon2	c.C656T	p.A219V
	Glyma.19G194900.1	exon1	c.A277G	p.T93A
	Glyma.19G195000.1	exon1	c.A103G	p.T35A
	Glyma.19G195300.1	exon13	c.G1557T	p.L519F		exon20	c.C2551T	p.P851S		exon23	c.C2957A	p.S986Y
	Glyma.19G195400.1	exon2	c.T868C	p.Y290H
	Glyma.19G195700.1	exon1	c.A347G	p.H116R		exon1	c.G370A	p.V124M
qLSR20	Glyma.20G116200.1	exon2	c.G25C	p.D9H

## Sheet: Tab.S5
Table S5 Indels occurring in gene CDS region in QTL interval.
Loci name	Gene ID	Indel1					Indel2
qLSR01	Glyma.01G151800.1	exon5	c.1053_1054insG	p.G351fs	frameshift
qLSR19	Glyma.19G195700.1	exon1	c.141_142insA	p.L47fs	frameshift
	Glyma.19G195000.1	exon1	c.39_40insAAAATATCGTTTTCAGGTCAGGGTGACCCAC	p.H13fs	frameshift		exon1	c.146_147insATCGTGT	p.S49fs	frameshift insertion
	Glyma.19G194900.1	exon1	c.312_320del	p.104_107del	nonframeshift
	Glyma.19G195700.1	exon1	c.330_332del	p.110_111del	nonframeshift

## Sheet: Tab.S6
Table S6 Stopgain mutation SNPs in QTL intervals.
Loci name	Gene ID	SNP
qLSR01	Glyma.01G153900.1	exon1	c.C28T	p.Q10X
qLSR18	Glyma.18G277000.1	exon1	c.G2524T	p.E842X
	Glyma.18G277400.1	exon2	c.T317A	p.L106X
	Glyma.18G279000.1	exon3	c.C205T	p.Q69X

## Sheet: Tab.S7
Table S7. List of primers used in this study.
Primer Name	primer sequences(5'-3')
Glyma.01G151800-Q-F	CGCTTCAACCCAAGATGTCGA
Glyma.01G151800-Q-R	GACCCCACGTTGGAAGGAGG
Glyma.18G279500-Q-F	TGAGCCTAGTGTAGAGGTTCCAA
Glyma.18G279500-Q-R	TGACAACTGTGCTGCCATTGG
Glyma.18G279600-Q-F	TCAGGTGATGGAGCAGAAGCTGG
Glyma.18G279600-Q-R	ACCTGAAGTGACTCAAGGTGATC
Glyma.19G194100-Q-F	ATGGAAAGGCTGAACTCAGAGTT
Glyma.19G194100-Q-R	GCTGGAACCAGAAGGACTTTGAC
Dt1-Q-F	CAGATGCCACATTTGGGAAAG
Dt1-Q-R	GTGGAGTAACACACTGTCTACG

## Sheet: Tab.S8
Table S8. Additive QTL ×the environment interaction effects for the in two RIL population
Chromosome	QTL	Population	Position（cM)	Marker interval	LOD	PVE(A)(%)	PVE(AbyE)(%)	Interaction effect between additive QTL and environment
								AE1	AE2
6	qRLS6	JS	110	Gm06:19403783-Gm06:46486183	4.3171	1.7731	0.2552	0.0186	-0.0186
18	qRLS18	JS	117	Gm18:55570282-Gm18:55724732	14.5619	2.3628	2.1329	0.0545	-0.0545
20	qRLS20	JS	52	Gm20:35767199-Gm20:35910712	91.3363	55.2522	1.8389	-0.0503	0.0503
3	qLSUP3	JS	62	Gm03:39064883-Gm03:39119155	4.5423	3.8662	0.4057	0.0263	-0.0263
10	qLSUP10	JS	63	Gm10:39068771-Gm10:39093320	6.9114	6.1415	0.2667	0.0214	-0.0214
10	qLSUP10	JS	96	Gm10:45004437-Gm10:45159991	13.5574	12.4285	0.0763	-0.0114	0.0114
14	qLSUP14	JS	0	Gm14:32009-Gm14:277700	7.1606	6.1564	0.6432	-0.0331	0.0331
18	qLSUP18	JS	119	Gm18:55804271-Gm18:56171564	24.983	15.4752	14.2802	-0.1571	0.1571
20	qLSUP20	JS	52	Gm20:35767199-Gm20:35910712	11.6964	6.7351	5.9819	0.1014	-0.1014
16	qLSDOWN16	JS	15	Gm16:2336659-Gm16:2390638	4.5028	0.815	0.0261	0.0106	-0.0106
20	qLSDOWN20	JS	52	Gm20:35767199-Gm20:35910712	182.459	74.8734	0.0332	-0.012	0.012
6	qLSDOWN6	JJ	142	Gm06:19788772-Gm06:34621845	4.6995	6.3536	2.5222	0.0105	-0.0105
1	qLSUP1	JJ	54	Gm01:49432006-Gm01:49761132	8.9738	4.6025	0.5911	0.0325	-0.0325
15	qLSUP15	JJ	45	Gm15:8280651-Gm15:9085621	4.5399	2.8475	0.0512	0.0095	-0.0095
17	qLSUP17	JJ	57	Gm17:10209159-Gm17:12449434	4.4747	3.7441	0.7751	-0.0374	0.0374
19	qLSUP19	JJ	108	Gm19:45157936-Gm19:45286223	26.7041	26.1768	2.8918	-0.0721	0.0721
1	qRLS1	JJ	51	Gm01:49026799-Gm01:49131130	7.0408	2.3484	2.0733	0.0378	-0.0378
1	qRLS1	JJ	53	Gm01:49432006-Gm01:49761132	4.5796	2.7016	2.3162	-0.0398	0.0398
6	qRLS6	JJ	141	Gm06:19380218-Gm06:19486680	5.8646	3.3376	0.5991	-0.0208	0.0208
12	qRLS12	JJ	20	Gm12:3549384-Gm12:3738868	4.7753	2.3314	2.9484	-0.0448	0.0448
15	qRLS15	JJ	45	Gm15:8280651-Gm15:9085621	4.18	2.5763	0.2215	0.0123	-0.0123
19	qRLS19	JJ	108	Gm19:45157936-Gm19:45286223	30.9561	30.0089	0.7587	-0.0229	0.0229
